# Supplementary material
Source: ML conference proceedings conference paper supplement (https://openreview.net/forum?id=DuPYSaCiep)
Supplement: supplementary_material [file attachment]

000  
001  
002  
003  
004  
005  
006  
007  
008  
009  
010  
011  
012  
013  
014  
015  
016  
017  
018  
019  
020  
021  
022  
023  
024  
025  
026  
027  
028  
029  
030  
031  
032  
033  
034  
035  
036  
037  
038  
039  
040  
041  
042  
043  
044  
045  
046  
047  
048  
049  
050  
051  
052  
053

---

## REVISION SUMMARY

To facilitate the review process, we summarize the supplementary content added to the paper. In response to the reviewers' comments, we have included the following additional experiments and analyses:

1. Added comparison with CosyVoice + ADV in Section 4.3 (Lines 373-402) and Table 1.
2. Included sensitivity analysis on the number of bins in Section 4.4 (Lines 424-429) and Figure 5.
3. Expanded comparison between UDDETTTS and the traditional non-LLM-based EmoSphere++ model in Section 4.4 (Lines 465-476), Table 3, and the rightmost subfigure of Figure 4.
4. Supplementary results on the ADV predictor, multi-task speech tokenizer, and emotional consistency between text semantics and synthesized speech in Section 4.5 (Lines 495-501) and Figure 8 in Appendix F.
5. Further explanation of the semi-supervised learning ablation in Section 4.6 (Lines 515-519).
6. Additional analysis of ADV-label conflict robustness in Appendix H.
